# Supplementary material for: Tetrahydrocannabinol (THC)-modified screen-printed carbon electrodes (SPCEs): insights into stability
Source: Royal Society of Chemistry journal article supplement (doi:10.1039/d4lf00110a), 2024-01-01
Supplement: d4lf00110a1.pdf [file d4lf00110a1.pdf]

## Tetrahydrocannabinol (THC)-Modified Screen-Printed Carbon Electrodes (SPCEs):

### Insights into Stability

Rehmat Grewal, Greter A. Ortega, Herlys Viltres, Amin Reza Rajabzadeh and Seshasai Srinivasan.

School of Engineering Practice and Technology, McMaster University, 1280 Main Street West Hamilton, ON, L8S 4L8, Canada.

## I. Supplementary Information

### S1. Statistical Analysis (ANOVA)

The one-way analysis of variance (ANOVA) was conducted to provide statistical evidence associated with the best storage conditions presented in Figures 5-7 in the manuscript.

#### *a. THCi-modified electrodes (130 ng) at -18°C over the span of 6 months*

The associated ANOVA analysis (Table S1a(1)) was performed using a significance level ( $\alpha$ ) of 0.05. With the resultant p-value  $< \alpha$ , the null hypothesis is rejected, implying that the mean AUC values for the modified electrodes are significantly different over time when stored at -18°C.

Table S1a(1): Overall ANOVA analysis performed for the THCi-modified electrodes stored at -18°C for 6 months.

|       | DF | Sum of Squares | Mean Square | F Value   | Prob>F      |
|-------|----|----------------|-------------|-----------|-------------|
| Model | 6  | 0.01121        | 0.00187     | 250.95651 | 4.77321E-17 |
| Error | 19 | 1.41506E-4     | 7.4477E-6   |           |             |
| Total | 25 | 0.01136        |             |           |             |

The corresponding percentage of variation ( $R^2$ ) of 98% (Table S1a(2)) signifies a highly robust model and indicates a strong relationship between the storage conditions and the stability of the electrodes. A coefficient of variation (CV) of 4.28% suggests a relatively low level of variability in the dataset compared to the mean. Hence, there is a high degree of consistency in the AUC values for the modified electrodes stored at -18°C over time. Analyzing Levene's Test (Table

S1a(3)) for determining the homogeneity of variance, the population variances are significantly different at the 0.05 significance level with the p-value  $< \alpha$ .

*Table S1a(2): Fit Statistics performed for the THCi-modified electrodes stored at -18°C for 6 months.*

|  | R-Square | Coeff Var | Root MSE | Data Mean |
|--|----------|-----------|----------|-----------|
|  | 0.98754  | 0.04283   | 0.00273  | 0.06371   |

*Table S1a(3): Levene's Test performed for the THCi-modified electrodes stored at -18°C for 6 months.*

|       | DF | Sum of Squares | Mean Square | F Value | Prob>F  |
|-------|----|----------------|-------------|---------|---------|
| Model | 6  | 2.79177E-5     | 4.65294E-6  | 5.2807  | 0.00237 |
| Error | 19 | 1.67413E-5     | 8.81122E-7  |         |         |

Lastly, the Tukey-Kramer test (Table S1a(4)) was conducted to compare multiple group means for each of the time periods, where Sig = 1 indicates that the difference of means is significant AND Sig = 0 indicates that the difference of means is insignificant at the 0.05 level. The results obtained demonstrate that pairs M2-D7, and M5-M4 consist of statistically insignificant differences with respect to their means. Since these are crucial time periods which mark the beginning and the end of the shelf-life study, the practical significance of using these storage conditions for the long-term stability of the modified electrodes is validated.

Table S1a(4): The Tukey Test performed for the THCi-modified electrodes stored at -18°C for 6 months.

|       | MeanDiff   | SEM     | q Value  | Prob       | Alpha | Sig | LCL       | UCL      |
|-------|------------|---------|----------|------------|-------|-----|-----------|----------|
| M1 D7 | -0.01953   | 0.00223 | 12.39726 | 7.19733E-7 | 0.05  | 1   | -0.02685  | -0.01221 |
| M2 D7 | -0.00101   | 0.00193 | 0.73896  | 0.99815    | 0.05  | 0   | -0.00735  | 0.00533  |
| M2 M1 | 0.01853    | 0.00193 | 13.57616 | 2.13855E-7 | 0.05  | 1   | 0.01219   | 0.02486  |
| M3 D7 | -0.01136   | 0.00223 | 7.20776  | 0.00105    | 0.05  | 1   | -0.01868  | -0.00404 |
| M3 M1 | 0.00818    | 0.00223 | 5.1895   | 0.02267    | 0.05  | 1   | 8.5798E-4 | 0.0155   |
| M3 M2 | -0.01035   | 0.00193 | 7.58384  | 5.94763E-4 | 0.05  | 1   | -0.01669  | -0.00401 |
| M4 D7 | -0.04372   | 0.00223 | 27.74998 | 0          | 0.05  | 1   | -0.05104  | -0.0364  |
| M4 M1 | -0.02419   | 0.00223 | 15.35272 | 5.99538E-8 | 0.05  | 1   | -0.03151  | -0.01687 |
| M4 M2 | -0.04272   | 0.00193 | 31.30395 | 0          | 0.05  | 1   | -0.04905  | -0.03638 |
| M4 M3 | -0.03237   | 0.00223 | 20.54222 | 6.65008E-8 | 0.05  | 1   | -0.03969  | -0.02505 |
| M5 D7 | -0.04288   | 0.00208 | 29.09491 | 0          | 0.05  | 1   | -0.04973  | -0.03604 |
| M5 M1 | -0.02335   | 0.00208 | 15.84168 | 5.05698E-8 | 0.05  | 1   | -0.03019  | -0.0165  |
| M5 M2 | -0.04187   | 0.00176 | 33.61607 | 0          | 0.05  | 1   | -0.04766  | -0.03609 |
| M5 M3 | -0.03153   | 0.00208 | 21.38949 | 1.27438E-7 | 0.05  | 1   | -0.03837  | -0.02468 |
| M5 M4 | 8.41667E-4 | 0.00208 | 0.57106  | 0.99957    | 0.05  | 0   | -0.006    | 0.00769  |
| M6 D7 | -0.05224   | 0.00208 | 35.44221 | 0          | 0.05  | 1   | -0.05908  | -0.04539 |
| M6 M1 | -0.0327    | 0.00208 | 22.18898 | 1.30518E-7 | 0.05  | 1   | -0.03955  | -0.02586 |
| M6 M2 | -0.05123   | 0.00176 | 41.1263  | 0          | 0.05  | 1   | -0.05701  | -0.04544 |
| M6 M3 | -0.04088   | 0.00208 | 27.73679 | 0          | 0.05  | 1   | -0.04773  | -0.03403 |
| M6 M4 | -0.00851   | 0.00208 | 5.77624  | 0.00939    | 0.05  | 1   | -0.01536  | -0.00167 |
| M6 M5 | -0.00935   | 0.00193 | 6.85587  | 0.0018     | 0.05  | 1   | -0.01569  | -0.00302 |

b. THCi-modified electrodes (130 ng) with a second modification of PBS (pH 4) at -18°C over the span of 6 months.

The overall ANOVA analysis for the THCi-modified electrodes with PBS(4) at -18°C for 6 months is depicted in Table S1b(1). The p-value  $< \alpha$  infers that the mean AUC values for the electrodes are significantly different over time at the 0.05 significance level. The corresponding  $R^2$  value (Table S1b(2)) of 96% implies a solid correlation between the storage conditions and the stability of the electrode at those conditions.

Table S1b(1): Overall ANOVA analysis performed for the THCi-modified electrodes with PBS(4) stored at -18°C for 6 months.

|       | DF | Sum of Squares | Mean Square | F Value   | Prob>F      |
|-------|----|----------------|-------------|-----------|-------------|
| Model | 6  | 0.07607        | 0.01268     | 118.03968 | 1.36871E-15 |
| Error | 22 | 0.00236        | 1.07409E-4  |           |             |
| Total | 28 | 0.07843        |             |           |             |

Table S1b(2): Fit Statistics performed for the THCi-modified electrodes with PBS(4) stored at -18°C for 6 months.

|  | R-Square | Coeff Var | Root MSE | Data Mean |
|--|----------|-----------|----------|-----------|
|  | 0.96987  | 0.05397   | 0.01036  | 0.19203   |

Examining the Levene's Test for the electrodes in Table S1b(3) with the p-value  $> \alpha$ , this corroborates that the population variances are not significantly different at the 0.05 level. Hence, the corresponding electrodes demonstrated exceptional stability using the storage conditions described.

Table S1b(3): Levene's Test performed for the THCi-modified electrodes with PBS(4) stored at -18°C for 6 months.

|       | DF | Sum of Squares | Mean Square | F Value | Prob>F  |
|-------|----|----------------|-------------|---------|---------|
| Model | 6  | 1.39851E-4     | 2.33085E-5  | 0.94961 | 0.48077 |
| Error | 22 | 5.39998E-4     | 2.45454E-5  |         |         |

Analyzing the resultant Tukey Test for the associated electrodes in Table S1b(4), multiple pairs of time periods consisted of insignificant differences between their means at the 0.05 significance level. These pairs comprised of M1-D7, M3-M2, M4-M2, M4-M3, M5-M2, M5-M3, M5-M4, M6-M2, M6-M3, M6-M4, and M6-M5. Therefore, these specific groups do not exhibit statistically significant variation in shelf life, valuable for quality control and the product stability.

Table S1b(4): The Tukey Test performed for the THCi-modified electrodes with PBS(4) stored at -18°C for 6 months.

|       | MeanDiff | SEM     | q Value  | Prob       | Alpha | Sig | LCL      | UCL      |
|-------|----------|---------|----------|------------|-------|-----|----------|----------|
| M1 D7 | -0.00683 | 0.00733 | 1.31708  | 0.96315    | 0.05  | 0   | -0.03054 | 0.01689  |
| M2 D7 | -0.11813 | 0.00733 | 22.79559 | 8.56344E-8 | 0.05  | 1   | -0.14184 | -0.09441 |
| M2 M1 | -0.1113  | 0.00733 | 21.47851 | 8.39501E-8 | 0.05  | 1   | -0.13502 | -0.08758 |
| M3 D7 | -0.11903 | 0.00695 | 24.21173 | 1.39416E-7 | 0.05  | 1   | -0.14152 | -0.09653 |
| M3 M1 | -0.1122  | 0.00695 | 22.82341 | 8.5667E-8  | 0.05  | 1   | -0.1347  | -0.0897  |
| M3 M2 | -9E-4    | 0.00695 | 0.18308  | 1          | 0.05  | 0   | -0.0234  | 0.0216   |
| M4 D7 | -0.11154 | 0.00669 | 23.57961 | 1.33739E-7 | 0.05  | 1   | -0.13319 | -0.08989 |
| M4 M1 | -0.10472 | 0.00669 | 22.13683 | 8.48275E-8 | 0.05  | 1   | -0.12637 | -0.08307 |
| M4 M2 | 0.00658  | 0.00669 | 1.3917   | 0.95229    | 0.05  | 0   | -0.01507 | 0.02823  |
| M4 M3 | 0.00748  | 0.00628 | 1.68637  | 0.88964    | 0.05  | 0   | -0.01283 | 0.02779  |
| M5 D7 | -0.10803 | 0.00898 | 17.0211  | 5.53563E-8 | 0.05  | 1   | -0.13707 | -0.07898 |
| M5 M1 | -0.1012  | 0.00898 | 15.94571 | 6.40884E-8 | 0.05  | 1   | -0.13025 | -0.07215 |
| M5 M2 | 0.0101   | 0.00898 | 1.59142  | 0.91338    | 0.05  | 0   | -0.01895 | 0.03915  |
| M5 M3 | 0.011    | 0.00867 | 1.79406  | 0.85869    | 0.05  | 0   | -0.01706 | 0.03906  |
| M5 M4 | 0.00352  | 0.00846 | 0.58772  | 0.99951    | 0.05  | 0   | -0.02387 | 0.0309   |
| M6 D7 | -0.12768 | 0.00733 | 24.63853 | 1.43138E-7 | 0.05  | 1   | -0.15139 | -0.10396 |
| M6 M1 | -0.12085 | 0.00733 | 23.32145 | 8.62292E-8 | 0.05  | 1   | -0.14457 | -0.09713 |
| M6 M2 | -0.00955 | 0.00733 | 1.84294  | 0.84329    | 0.05  | 0   | -0.03327 | 0.01417  |
| M6 M3 | -0.00865 | 0.00695 | 1.75956  | 0.86906    | 0.05  | 0   | -0.03115 | 0.01385  |
| M6 M4 | -0.01613 | 0.00669 | 3.41054  | 0.24027    | 0.05  | 0   | -0.03778 | 0.00552  |
| M6 M5 | -0.01965 | 0.00898 | 3.09618  | 0.34012    | 0.05  | 0   | -0.0487  | 0.0094   |

c. THCi-modified electrodes (130 ng) with a second modification of PBS (pH 4) at 4°C over the span of 6 months.

The overall ANOVA analysis for the affiliated electrodes is presented in Table S1c(1). As per the  $p\text{-value} < \alpha$ , the AUC means for the modified electrodes are significantly different at the 0.05 level. Approximately 76% of the total variation (Table S1c(2)) associated with the stability of the electrodes can be accounted for by the storage conditions used, specifically, the storage at 4°C in this case. Interpreting the Levene's Test of Absolute Deviations (Table S1c(3)) with the p-

value  $> \alpha$ , it can be concluded that the variances in the AUC values of the electrodes are insignificant over time at the 0.05 significance level.

Table S1c(1): Overall ANOVA analysis performed for the THCi-modified electrodes with PBS(4) stored at 4°C for 6 months.

|       | DF | Sum of Squares | Mean Square | F Value  | Prob>F     |
|-------|----|----------------|-------------|----------|------------|
| Model | 6  | 0.00555        | 9.25594E-4  | 15.01965 | 1.28803E-7 |
| Error | 28 | 0.00173        | 6.16255E-5  |          |            |
| Total | 34 | 0.00728        |             |          |            |

Table S1c(2): Fit Statistics performed for the THCi-modified electrodes with PBS(4) stored at 4°C for 6 months.

|  | R-Square | Coeff Var | Root MSE | Data Mean |
|--|----------|-----------|----------|-----------|
|  | 0.76295  | 0.09157   | 0.00785  | 0.08573   |

Table S1c(3): Levene's Test (Absolute Deviations) performed for the THCi-modified electrodes with PBS(4) stored at 4°C for 6 months.

|       | DF | Sum of Squares | Mean Square | F Value | Prob>F  |
|-------|----|----------------|-------------|---------|---------|
| Model | 6  | 1.48209E-4     | 2.47014E-5  | 1.55813 | 0.19634 |
| Error | 28 | 4.43892E-4     | 1.58533E-5  |         |         |

Examining Tukey's Test for multiple groups means in Table S1c(4), numerous pairs of groups exhibited insignificant differences among the means at the 0.05 significance level. The pairs consist of M2-D7, M3-D7, M3-M2, M4-D7, M4-M2, M4-M3, M5-D7, M5-M2, M5-M4, M6-D7, M6-M3, and M6-M4. Hence, the Tukey Test supports the storage conditions tested for its contribution to extending the stability of the modified electrodes.



Table S1c(4): The Tukey Test performed for the THCi-modified electrodes with PBS(4) stored at 4°C for 6 months.

|       | MeanDiff | SEM     | q Value  | Prob       | Alpha | Sig | LCL      | UCL         |
|-------|----------|---------|----------|------------|-------|-----|----------|-------------|
| M1 D7 | 0.03081  | 0.00496 | 8.77657  | 2.00334E-5 | 0.05  | 1   | 0.01506  | 0.04656     |
| M2 D7 | 0.0078   | 0.00496 | 2.22234  | 0.70059    | 0.05  | 0   | -0.00795 | 0.02355     |
| M2 M1 | -0.02301 | 0.00496 | 6.55423  | 0.00131    | 0.05  | 1   | -0.03876 | -0.00726    |
| M3 D7 | -0.00624 | 0.00496 | 1.77628  | 0.8656     | 0.05  | 0   | -0.02199 | 0.00951     |
| M3 M1 | -0.03705 | 0.00496 | 10.55284 | 8.09407E-7 | 0.05  | 1   | -0.0528  | -0.0213     |
| M3 M2 | -0.01404 | 0.00496 | 3.99862  | 0.10491    | 0.05  | 0   | -0.02979 | 0.00171     |
| M4 D7 | -0.00165 | 0.00496 | 0.46885  | 0.99987    | 0.05  | 0   | -0.0174  | 0.0141      |
| M4 M1 | -0.03246 | 0.00496 | 9.24542  | 8.38147E-6 | 0.05  | 1   | -0.04821 | -0.01671    |
| M4 M2 | -0.00945 | 0.00496 | 2.69119  | 0.49498    | 0.05  | 0   | -0.0252  | 0.0063      |
| M4 M3 | 0.00459  | 0.00496 | 1.30743  | 0.96531    | 0.05  | 0   | -0.01116 | 0.02034     |
| M5 D7 | 0.0122   | 0.00496 | 3.47394  | 0.21361    | 0.05  | 0   | -0.00355 | 0.02795     |
| M5 M1 | -0.01862 | 0.00496 | 5.30263  | 0.01275    | 0.05  | 1   | -0.03437 | -0.00287    |
| M5 M2 | 0.00439  | 0.00496 | 1.2516   | 0.97193    | 0.05  | 0   | -0.01136 | 0.02014     |
| M5 M3 | 0.01843  | 0.00496 | 5.25022  | 0.01397    | 0.05  | 1   | 0.00268  | 0.03418     |
| M5 M4 | 0.01384  | 0.00496 | 3.94279  | 0.11368    | 0.05  | 0   | -0.00191 | 0.02959     |
| M6 D7 | -0.00877 | 0.00496 | 2.49693  | 0.58047    | 0.05  | 0   | -0.02452 | 0.00698     |
| M6 M1 | -0.03958 | 0.00496 | 11.2735  | 2.49058E-7 | 0.05  | 1   | -0.05533 | -0.02383    |
| M6 M2 | -0.01657 | 0.00496 | 4.71927  | 0.03431    | 0.05  | 1   | -0.03232 | -8.18687E-4 |
| M6 M3 | -0.00253 | 0.00496 | 0.72065  | 0.9985     | 0.05  | 0   | -0.01828 | 0.01322     |
| M6 M4 | -0.00712 | 0.00496 | 2.02808  | 0.77914    | 0.05  | 0   | -0.02287 | 0.00863     |
| M6 M5 | -0.02096 | 0.00496 | 5.97087  | 0.00386    | 0.05  | 1   | -0.03671 | -0.00521    |

## S2. XPS Characterization

Table Table S2a: XPS survey data (atomic percentage) for the most concentrated elements in the materials.

| Samples        | Elements (At. %) |      |      |       |       |       |
|----------------|------------------|------|------|-------|-------|-------|
|                | C 1s             | O 1s | N 1s | Cl 2p | Si 2p | Fe 2p |
| <b>P-Z*</b>    | 82.2             | 8.7  | 0.4  | 7.9   | 0.9   | 0.3   |
| <b>Control</b> | 77.4             | 9.1  | 2.2  | 10.1  | 1.0   | 0.2   |
| <b>RT</b>      | 81.1             | 9.5  | 1.4  | 7.4   | 0.4   | 0.2   |
| <b>4CT</b>     | 82.2             | 10.2 | 1.5  | 5.9   | -     | 0.2   |

|              |      |      |     |   |     |     |
|--------------|------|------|-----|---|-----|-----|
| <b>-18CT</b> | 73.6 | 21.4 | 0.7 | - | 2.8 | 1.4 |
|--------------|------|------|-----|---|-----|-----|

\*P-Z: Pristine Zensor electrode

Table S2b: The peak-fitting results of C1s high-resolution signal of materials.

| <b>Samples</b> | <b>Assignment</b>            | <b>E<sub>B</sub> (eV)</b> | <b>FWHM (eV)</b> | <b>At. %</b> |
|----------------|------------------------------|---------------------------|------------------|--------------|
| <b>P-Z</b>     | <b>C1s</b> C=C aromatic      | 284.4                     | 0.6              | 16.2         |
|                | <b>C1s</b> C-C, C-H          | 285.0                     | 1.3              | 57.6         |
|                | <b>C1s</b> C-OH, C-O-C, C-Cl | 286.5                     | 1.3              | 22.0         |
|                | <b>C1s</b> O-C=O             | 289.0                     | 1.3              | 4.2          |
| <b>Control</b> | <b>C1s</b> C=C aromatic      | 284.4                     | 0.7              | 18.2         |
|                | <b>C1s</b> C-C, C-H          | 285.0                     | 1.5              | 51.1         |
|                | <b>C1s</b> C-OH, C-O-C, C-Cl | 286.4                     | 1.5              | 26.3         |
|                | <b>C1s</b> O-C=O             | 288.8                     | 1.6              | 4.4          |
| <b>RT</b>      | <b>C1s</b> C=C aromatic      | 284.2                     | 0.9              | 20.4         |
|                | <b>C1s</b> C-C, C-H          | 285.0                     | 1.4              | 49.4         |
|                | <b>C1s</b> C-OH, C-O-C, C-Cl | 286.3                     | 1.5              | 26.0         |
|                | <b>C1s</b> O-C=O             | 288.7                     | 1.7              | 4.2          |
| <b>4CT</b>     | <b>C1s</b> C=C aromatic      | 284.3                     | 0.8              | 17.7         |
|                | <b>C1s</b> C-C, C-H          | 285.0                     | 1.5              | 55.9         |
|                | <b>C1s</b> C-OH, C-O-C, C-Cl | 286.4                     | 1.5              | 23.8         |
|                | <b>C1s</b> O-C=O             | 288.7                     | 1.6              | 2.7          |
| <b>-18CT</b>   | <b>C1s</b> C=C aromatic      | 284.4                     | 1.0              | 24.8         |
|                | <b>C1s</b> C-C, C-H          | 285.0                     | 1.4              | 55.5         |
|                | <b>C1s</b> C-OH, C-O-C, C-Cl | 286.5                     | 1.4              | 9.9          |



|  |                           |       |     |     |
|--|---------------------------|-------|-----|-----|
|  | <b>C1s</b> $\text{O-C=O}$ | 288.4 | 1.7 | 9.8 |
|--|---------------------------|-------|-----|-----|

*Table S2c: The peak-fitting results of O1s high-resolution signal of materials.*

| Samples        | Assignment                                               | E <sub>B</sub> (eV) | FWHM (eV) | At. % |
|----------------|----------------------------------------------------------|---------------------|-----------|-------|
| <b>P-Z</b>     | <b>O1s</b> $\text{C=O}$                                  | 532.5               | 1.5       | 68.3  |
|                | <b>O1s</b> $\text{O}^{*}\text{-(C=O)-C, C-O aromatic}$   | 533.5               | 1.6       | 31.7  |
| <b>Control</b> | <b>O1s</b> $\text{C=O}$                                  | 532.2               | 1.6       | 51.5  |
|                | <b>O1s</b> $\text{O}^{*}\text{-(C=O)-C, C-O aromatic}$   | 533.5               | 1.7       | 48.5  |
| <b>RT</b>      | <b>O1s</b> $\text{C=O}$                                  | 532.1               | 1.6       | 43.4  |
|                | <b>O1s</b> $\text{O}^{*}\text{-(C=O)-C, C-O (aromatic)}$ | 533.4               | 1.8       | 56.5  |
| <b>4CT</b>     | <b>O1s</b> $\text{C=O}$                                  | 532.2               | 1.6       | 45.4  |
|                | <b>O1s</b> $\text{O}^{*}\text{-(C=O)-C, C-O (aromatic)}$ | 533.4               | 1.8       | 54.6  |
| <b>-18CT</b>   | <b>O1s</b> $\text{C=O}$                                  | 532.4               | 1.6       | 60.6  |
|                | <b>O1s</b> $\text{O}^{*}\text{-(C=O)-C, C-O (aromatic)}$ | 533.6               | 1.8       | 39.4  |

### S3. Additional modifiers

Organic compounds, including Ascorbic Acid (AA) and Citric Acid (CA) were used to perform a second modification on the THCi-modified electrodes to perform their role as antioxidants and radical scavengers in controlling the oxidation of THC. Both, AA-modified and CA-modified electrodes were vacuum sealed with O<sub>2</sub> absorbers and stored at 4°C for a period of one week. Although the corresponding results (Figure S3a) depict similar electrochemical behaviour to THCi-modified electrodes with a second modification of PBS (pH 4), the signals only remained stable for up to day three, after which the intensity of the signal was observed to decrease on day

7. Additionally, electrodes with a second modification of these organic compounds also exhibited significantly low reproducibility.

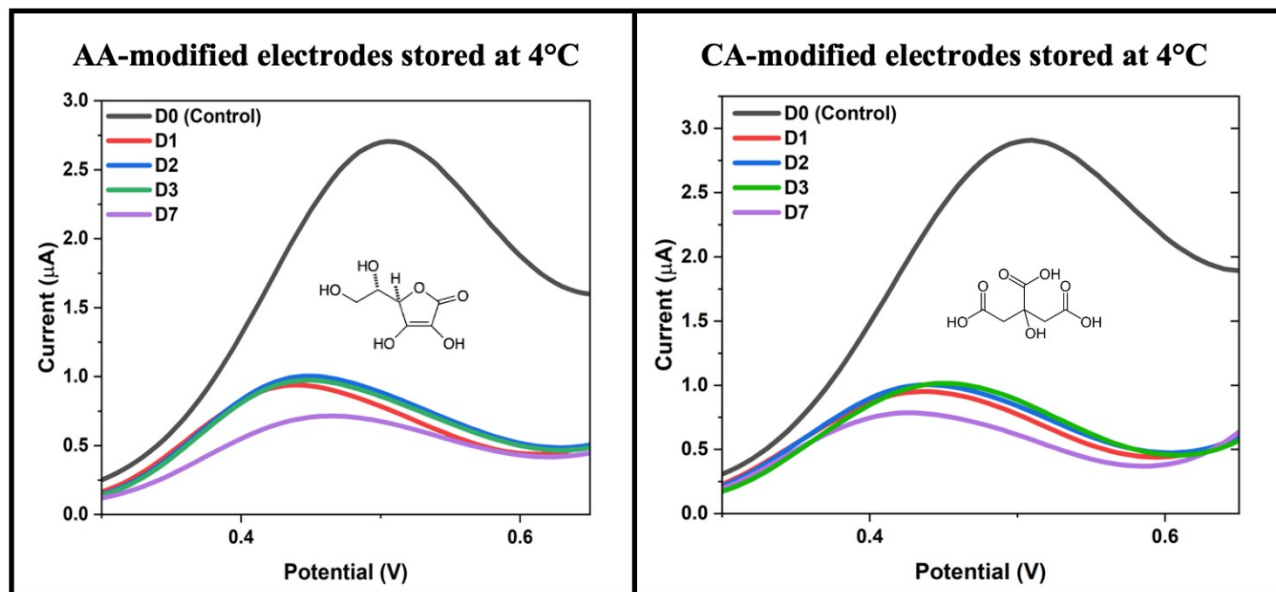

Figure S3a: AA-modified electrodes (13 ng) and CA-modified electrodes (13 ng) stored at 4°C for a period of one week.

BHT is yet another organic chemical which functions by blocking the propagation of free radicals, and hence, it was used for its antioxidant properties in this study. The THCi-modified electrodes were modified with a second modification of BHT in conjunction with Transcutol as was previously reported in the literature for THC [S1], vacuum sealed with O<sub>2</sub> absorbers and stored on the lab bench at RT for a period of one month. The results showcase (Figure S3b) that the modified electrodes only remained stable for a period of two days at RT, after which flat signals were observed for the subsequent days.

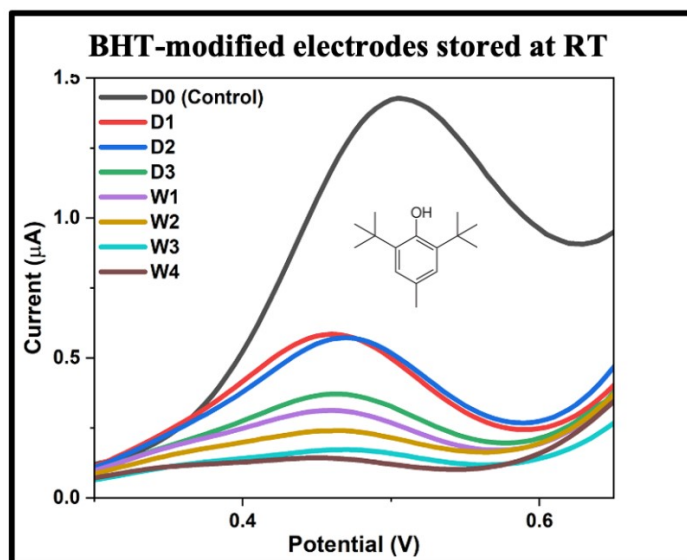

Figure S3b: BHT-modified electrodes (5.2 ng) stored at RT for one month.

#### S4. Alternative modifiers

THCA is the inactive and the more stable precursor of THC due to the presence of an extra carboxylic group. The TE-100 Zensor electrodes were manually modified with 130 ng of THCA, vacuum sealed with O<sub>2</sub> absorbers, placed in a mylar bag and stored on the lab bench at RT and in the refrigerator at 4°C for a period of one week (Figure S4a). The electrodes were tested using PBS (pH 7.4) via SWV, during which the electrochemical signals displayed an additional second peak during detection (SCAN 2). The presence of the second peak denotes the occurrence of the partial decomposition of THCA into its decarboxylated product, THC.

Comparing the different temperatures for storing the THCA-modified electrodes, storage at both RT and 4°C provided stable electrochemical signals for the entire span of one week. With reproducibility and high intensity values being prime factors in engendering stability, in addition to the second peak observed, the resultant intensities obtained in the graph are too low to be used for the purposes of THC detection.

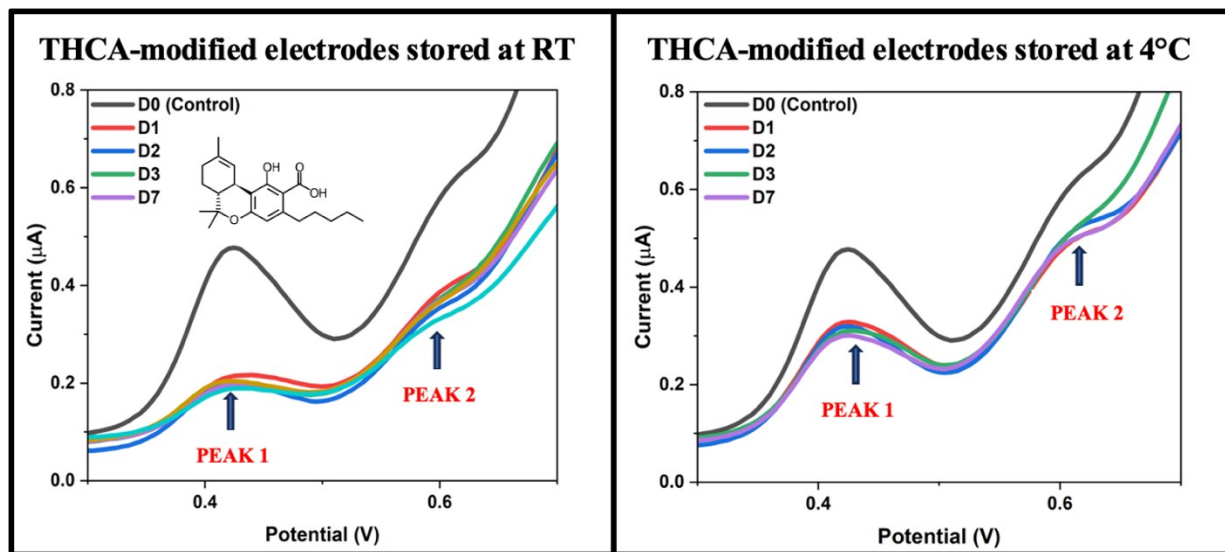

Figure S4a: THCA-modified electrodes (130 ng) stored on the lab bench at RT and at 4°C for a period of one week.

Dopamine is a neurotransmitter with a similar electrochemical behaviour to that of THC i.e., with an irreversible oxidation potential at approximately 0.45 V. An amount of 100 ng of DA was manually deposited onto the WE of the pristine electrodes after incubating the deposition sample for 0 minutes and 30 minutes. Irrespective of the sample incubation time tested, the DA-modified electrodes exhibited a broad electrochemical signal comprised of two different oxidation potentials and hence, were unable to detect the oxidation of THC (Figure S4b). In this case, DA displayed a reversible oxidation peak at 0.25 V, implying electro-oxidation of the molecule. After conducting the first scan, the subsequent four scans for the molecule presented a flat signal via SWV.

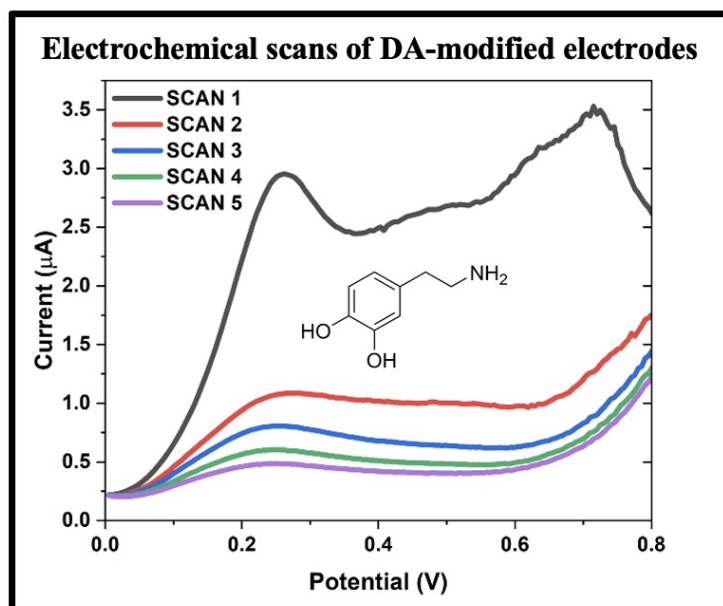

Figure S4b: The electrochemical behaviour of DA-modified electrodes (100 ng).

Subsequently, the manual deposition of 130 ng of CBD was performed onto the WE of the TE-100 Zensor electrodes after incubating the deposition sample for 40 minutes. The CBD-modified electrodes were vacuum sealed with O<sub>2</sub> absorbers and stored on the lab bench at RT, and at 4°C for a period of one week. CBD is known to undergo the course of oxidation at the same oxidation potential value as THC (0.48 V) due to the analogous redox active moieties present in both molecules. The resultant graphs (Figure S4c) obtained in PBS (pH 7.4) via SWV display the same electrochemical behaviour as that of THC at both temperature conditions. The peak current values demonstrate stability at both RT and 4°C until day 3, after which the signal is observed to decrease.

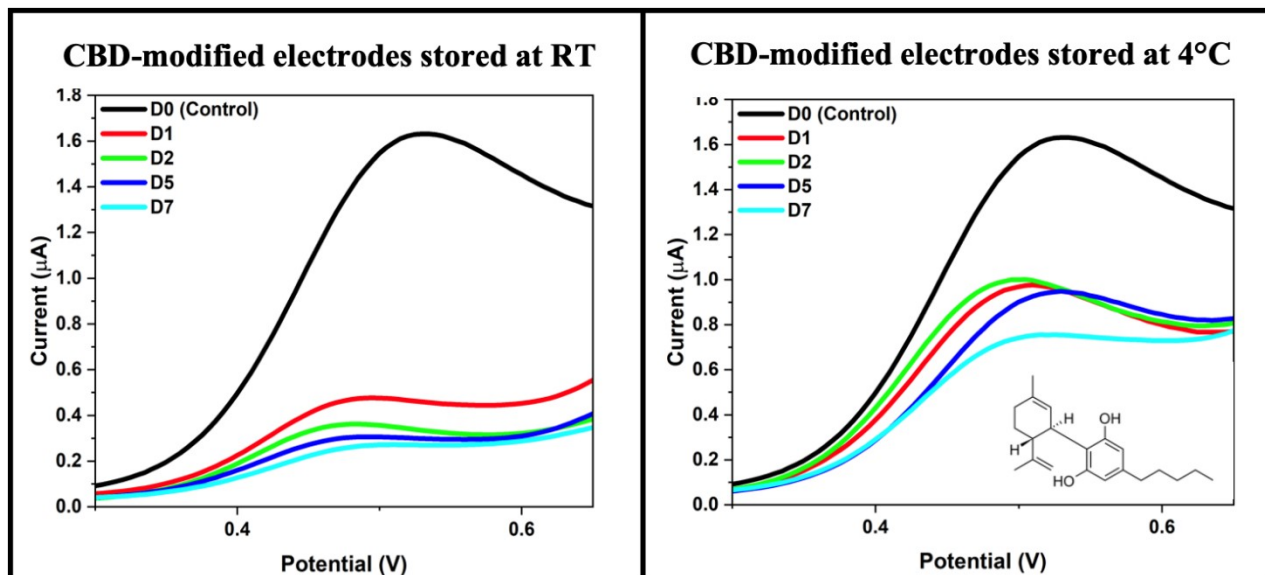

Figure S4c: CBD-modified electrodes (130 ng) stored on the lab bench at RT and at 4°C for a period of one week.

Lastly, pristine electrodes were manually modified with THC-OAc (130 ng) and subjected to SCAN 2 using SWV at RT in PBS (pH 10) and PBS (pH 12). The resultant graph (Figure S4d) demonstrates the lack of signals due to THC oxidation despite a high basic pH, invalidating this modification for sensing purposes. Hence, the flat signals obtained were unfavourable for the purposes of extending stability for our research.

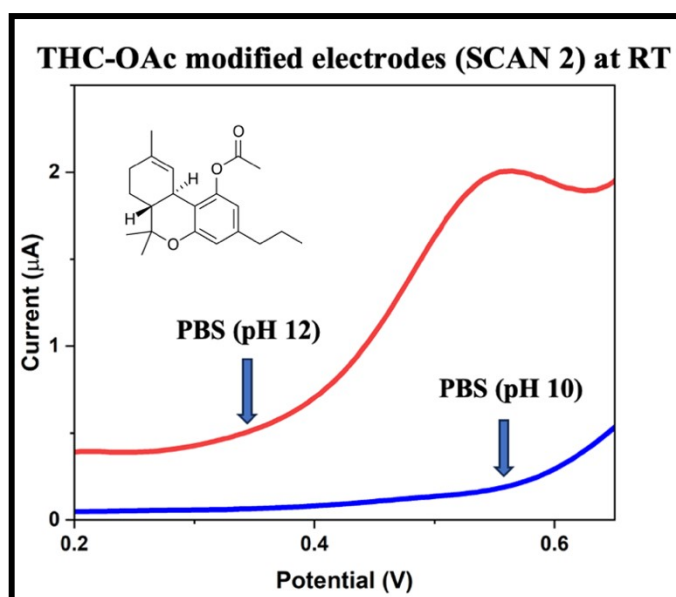

Figure S4d: THC-OAc-modified electrodes (130 ng) SCAN 2 performed in PBS(10) and PBS(12) at RT.



## References

- S1. G. Gonzalez-Cuevas et al., “Unique treatment potential of cannabidiol for the prevention of relapse to drug use: Preclinical proof of principle,” *Neuropsychopharmacology*, vol. 43, pp. 2036–2045, 2018, doi: 10.1038/s41386-018-0050-8.
